# Supplementary material for: Socioeconomic Gradients and Mechanisms of Chronic Disease Health Literacy: The Mediating Role of Preventive Healthcare Utilization in Rural China
Source: Research Square preprint supplement (doi:10.21203/rs.3.rs-6811235/v1), 2025-07-07
Supplement: Supplementary file 1 [file 9a1bdbcd8b3d7e26d964c2b2.docx]

| **Table S1 Definitions and Groupings of Socioeconomic Status, Health Service Utilization, and Chronic Disease Factors** | | | |
| --- | --- | --- | --- |
| **Variables** | **Subvariables** | **Groupings/Definitions** | **Sample Size/Notes** |
| Socioeconomic status | Total Household Income (CNY) | Grouped into 7 levels:  ① < 5,000  ② 5,000–10,000  ③ 10,000–20,000  ④ 20,000–30,000  ⑤ 30,000–50,000  ⑥ 50,000–100,000  ⑦ > 100,000 |  |
|
|
| Education Qualifications | Educational Attainment | ① Primary school or below ② Junior high school ③ Senior high school/technical secondary ④ Junior college ⑤ Bachelor’s degree or above ⑥ Other professional qualifications (e.g., nursing, teaching) ⑦ None of the above |  |
|
|
|
|
|
|
|
| Employment Status | Employment Category | ① Agricultural workers (farmers, herders, fishermen) ② Factory/enterprise workers ③ Commercial/service workers ④ Government/public institution employees (civil servants, teachers, healthcare workers) ⑤ Students ⑥ Others (unemployed, caregivers, etc.) |  |
|
|
|
|
|
|
|
| Employed status defined as paid |
|
|
| Environmental & Behavioral Factors | Physical Examination Frequency | ① Never ② Annually ③ Semi-annually ④ Quarterly ⑤ Monthly |  |
|
|
| Health Knowledge Exposure | 0 No exposure ① 0–1 times ② 2–4 times ③ 5–7 times |
| Digital Health Tool Usage | 0 Never ≤1 time/month 2–3 times/month 1–2 times/week ≥3 times/week ≥1 time/day |
| Health Behavior Change | 1 Yes (changed behavior based on health knowledge) |
| Chronic Comorbidity Factors | CeVD(Cerebrovascular Disease ) | Diagnosed as stroke, cerebral infarction, transient ischemic attack (TIA), or other cerebrovascular disorders. |  |
| CAD (Coronary Artery Disease) | ICD-9 codes 410–412; ICD-10 codes I21–I23, I24.1, and I25.2 | Note: Coronary Artery Disease diagnosis |
| Hypertension | ICD-9 codes 401–405; ICD-10 codes I10-I13, I15, O10 | Note: Hypertension diagnosis |
| Diabetes | ICD-9 codes 250; ICD-10 codes E10–E14 | Note: Diabetes diagnosis |
| Cancer | ICD-10 codes C00–D48 | Note: Cancer diagnosis |
| Outcome | Chronic Disease Literacy | Based on an 80% threshold: |  |
| Adequate literacy(≥80%) |
| Inadequate literacy(<80%) |

| **Table S2 Latent Class Analysis of Socioeconomic and Demographic Characteristics with Posterior Probabilities** | | | | |
| --- | --- | --- | --- | --- |
|  |  |  |  |  |
| Item | Category | Latent class 1 | Latent class 2 | Latent class 3 |
|  |  | Low SES | Middle SES | High SES |
| Income (CNY) | ① Below 5,000 (506) | 0.85 | 0.12 | 0.03 |
|  | ② 5,000–10,000 (419) | 0.78 | 0.19 | 0.03 |
|  | ③ 10,000–20,000 (481) | 0.15 | 0.72 | 0.13 |
|  | ④ 20,000–30,000 (473) | 0.08 | 0.81 | 0.11 |
|  | ⑤ 30,000–50,000 (499) | 0.05 | 0.23 | 0.72 |
|  | ⑥ 50,000–100,000 (346) | 0.02 | 0.11 | 0.87 |
|  | ⑦ Above 100,000 (N/A) | 0.01 | 0.08 | 0.91 |
| Education Level | ① Primary school or below (715) | 0.89 | 0.09 | 0.02 |
|  | ② Junior high school (1381) | 0.76 | 0.21 | 0.03 |
|  | ③ Senior high school/technical secondary | 0.12 | 0.83 | 0.05 |
|  | ④ Junior college (166) | 0.07 | 0.68 | 0.25 |
|  | ⑤ Bachelor's degree or above (69) | 0.03 | 0.14 | 0.83 |
| Occupation | ① Agricultural workers (1932) | 0.92 | 0.06 | 0.02 |
|  | ② Factory/enterprise workers (219) | 0.81 | 0.15 | 0.04 |
|  | ③ Commercial/service workers (166) | 0.18 | 0.77 | 0.05 |
|  | ④ Government/public institution employees | 0.04 | 0.22 | 0.74 |
|  | ⑤ Students (49) | 0.11 | 0.35 | 0.54 |
|  | ⑥ Others (unemployed, caregivers) (308) | 0.85 | 0.12 | 0.03 |
| MeanPP |  | 0.82 | 0.79 | 0.85 |
| Prevalence (%) |  | 0.39 | 0.45 | 0.16 |

| **Table S3 Mediation Effects of Socioeconomic Status on Chronic Disease Literacy Through Preventive Healthcare Utilization and Comorbidity Factors** | | | | | | |
| --- | --- | --- | --- | --- | --- | --- |
| Outcome | Exposure | Mediator | Effect with mediator adjusted | Indirect effect by mediator | Mediation proportion (%) | *P* |
| Infectious diseases | SES | Healthy sleep pattern | 0.069(0.055,0.085) | -0.002(-0.006,0.002) | 0 | 0.124 |
| Health condition(New serial number) | 0.070(0.056,0.084) | 0.003(-0.001,0.009) | 0 | 0.087 |
| Marital ststus (New serial number) | 0.068(0.054,0.080) | -0.003(-0.020,0.004) | 0 | 0.158 |
| Age | 0.071(0.057,0.085) | 0.003(-0.009,0.028) | 0 | 0.156 |
| Marital ststus ( serial number) | 0.069(0.055,0.083) | 0.000(-0.010,0.016) | 0 | 0.345 |
| Gender | 0.070(0.056,0.082) | -0.000(-0.001,0.001) | 0 | 0.892 |
| Hypertension | 0.072(0.058,0.086) | -0.002(-0.013,-0.000) | 3.421 | 0.032 |
| Diabetes | 0.068(0.055,0.081) | -0.000(-0.005,0.001) | 0 | 0.673 |
| Cancer | 0.070(0.055,0.084) | 0.000(-0.000,0.001) | 0 | 0.912 |
| Effect and proportion estimations and P values were adjusted for age, sex. Abbreviations: SES: Socioeconomic status. | | | | | | |

| **Table S4 Sex differences in Chronic Disease Literacy across socioeconomic status (SES) subgroups** | | | | | |
| --- | --- | --- | --- | --- | --- |
| SES | Subgroup | *OR* (95% *CI*) | *P* | *OR* (95% *CI*) | *P* |
|
| HIgh | Female | 0.7141 (0.3720, 1.3603) | 0.3059 | 1 [Reference] | —— |
| Male | 1 [Reference] | —— | 1.20 (0.90, 1.60) | 0.181 |
| Medium | Female | 0.8462 (0.5441, 1.3187) | 0.4587 | 0.85 (0.70, 1.05) | 0.12 |
| Male | 1 [Reference] | —— | 0.90 (0.75, 1.10) | 0.352 |
| Low | Female | 0.6364 (0.2151, 1.7782) | 0.3952 | 0.60 (0.50, 0.75) | <0.001 |
| Male | 1 [Reference] | —— | 0.65 (0.55, 0.78) | 0.002 |
| Odds ratios (ORs) and P values were adjusted for age, sex. Abbreviations: SES: Socioeconomic status | | | | | |

| **Table S5 Association between age and Chronic Disease Literacy by socioeconomic status (SES)** | | | | | |
| --- | --- | --- | --- | --- | --- |
| SES | Subgroup | *OR (95% CI)* | *P* | *OR (95% CI)* | *P* |
|
| High | ≤60 years old | 1 [Reference] | —— | 1 [Reference] | —— |
| ＞60 years old | 1.2195 (0.6375, 2.3865) | 0.5532 | 0.95 (0.75, 1.45) | 0.327 |
| Medium | ≤60 years old | 1 [Reference] | —— | 0.82 (0.68, 1.02) | 0.062 |
| ＞60 years old | 1.4494 (0.9079, 2.2900) | 0.1149 | 0.93 (0.72, 1.39) | 0.339 |
| Low | ≤60 years old | 1 [Reference] | —— | 0.62 (0.52, 0.75) | 0.016 |
| ＞60 years old | 2.3175 (0.5662, 8.2593) | 0.2083 | 0.70 (0.42,0.91) | 0.001 |
| Spearman correlation coefficients and P values were adjusted for age, sex. Categorical variables are presented as number (percentage). Abbreviations: SES: Socioeconomic status. | | | | | |
