# Supplementary material for: Socioeconomic Gradients and Mechanisms of Chronic Disease Health Literacy: The Mediating Role of Preventive Healthcare Utilization in Rural China
Source: Research Square preprint supplement (doi:10.21203/rs.3.rs-6811235/v1), 2025-07-07
Supplement: Supplementary file 1 [file f5876ca6db99d1f4fca01dd0.pdf]

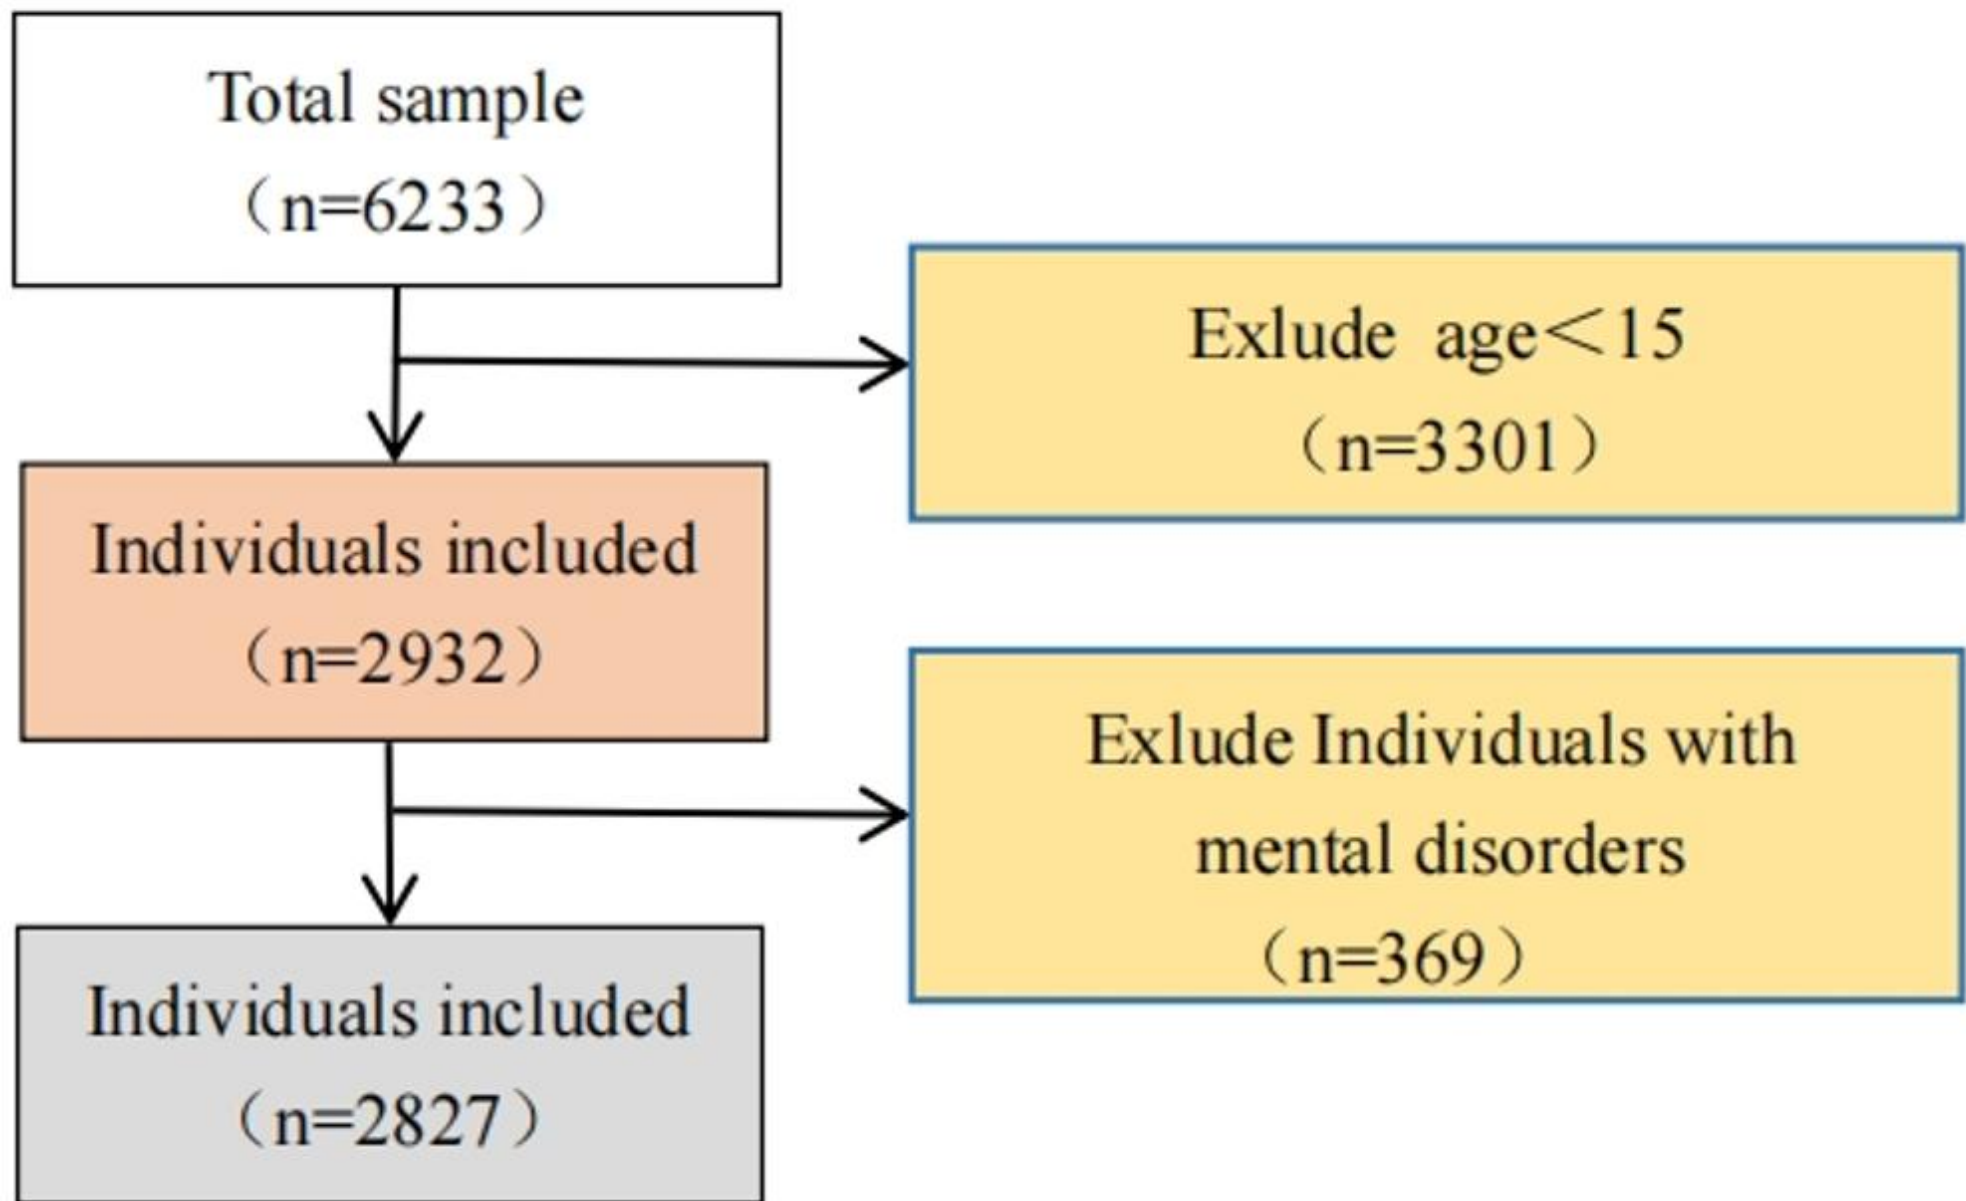

Figure S1: Analysis of Sample Screening Process

Model Selection Metrics by Number of Classes

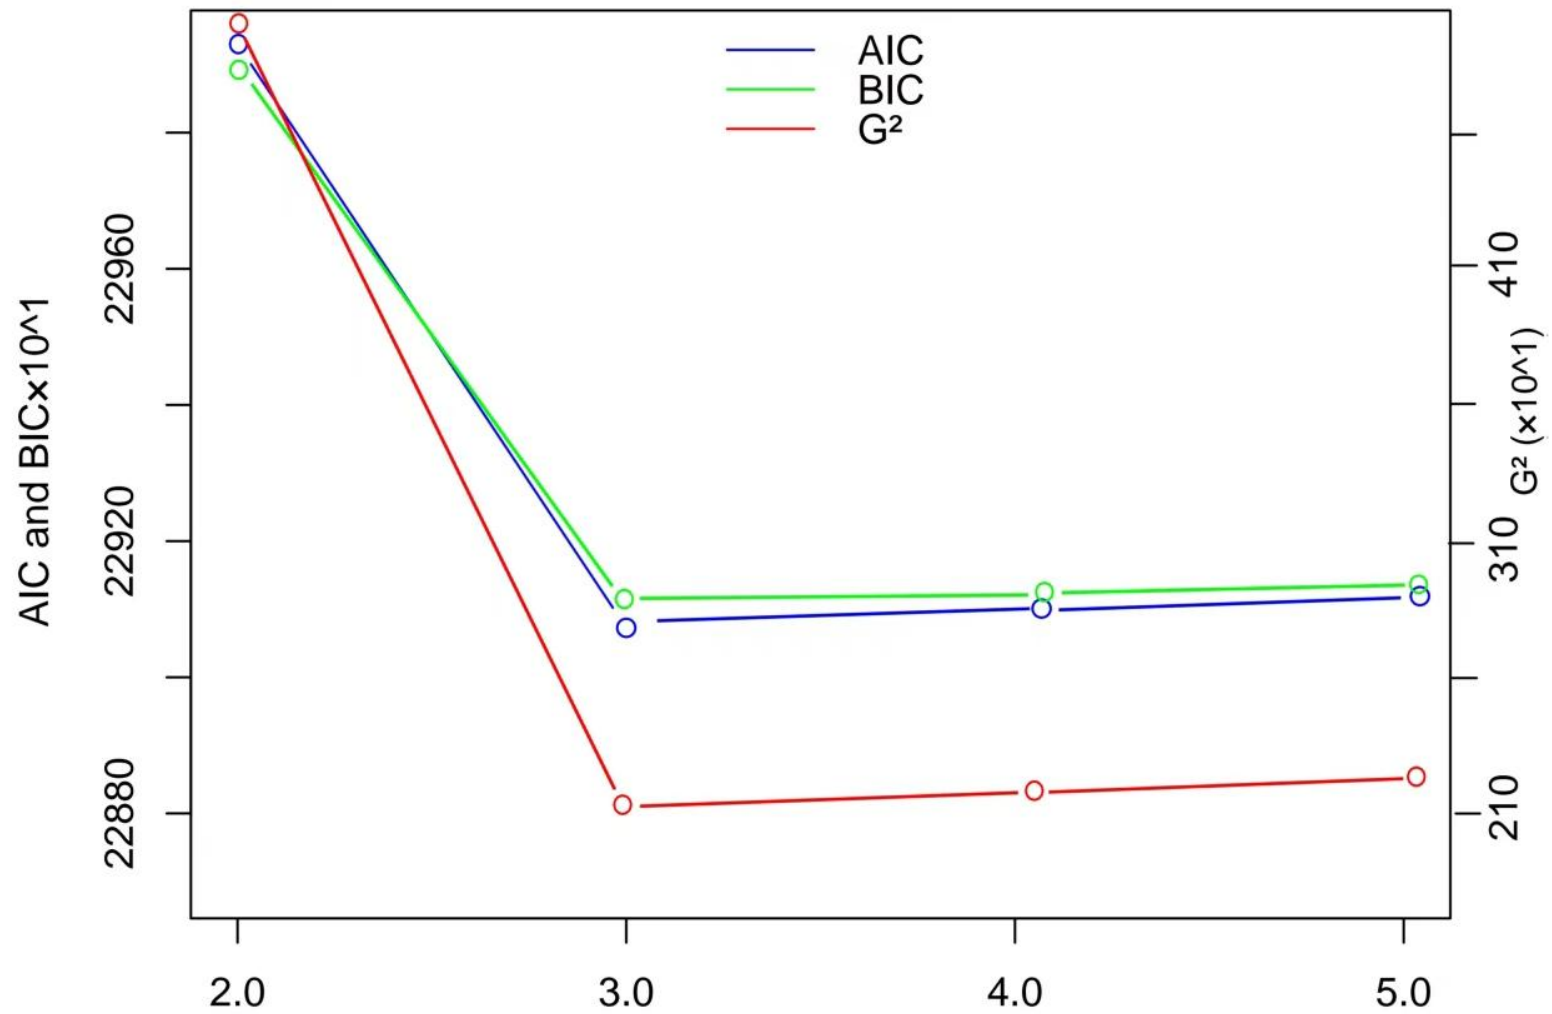

Figure S2: G2 statistics, AIC, and BIC in models with different numbers of latent classes

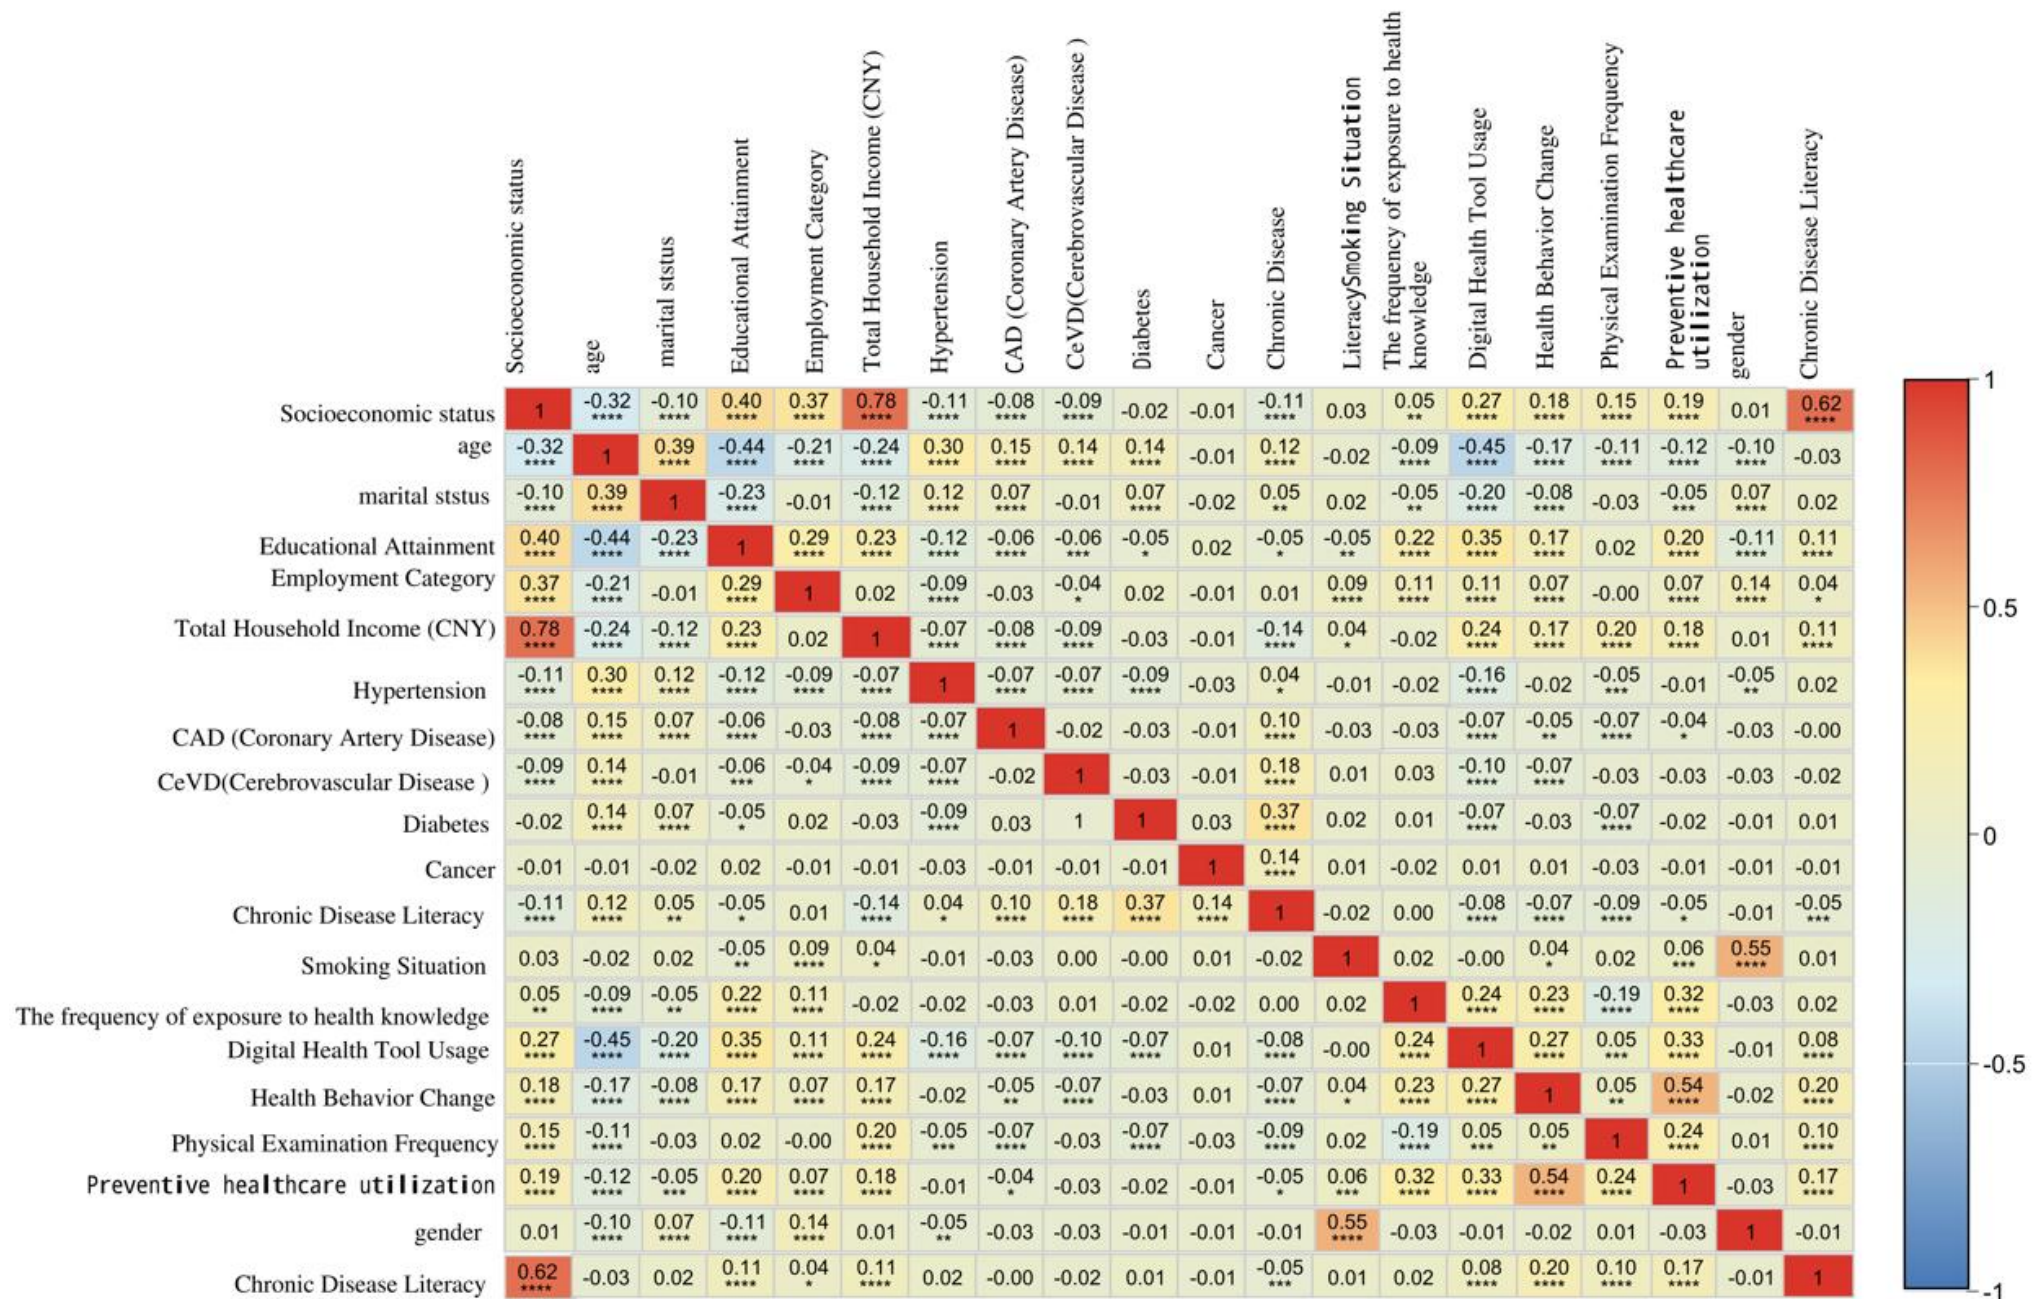

Figure S3: Heatmap of Correlations among Health - related Variables

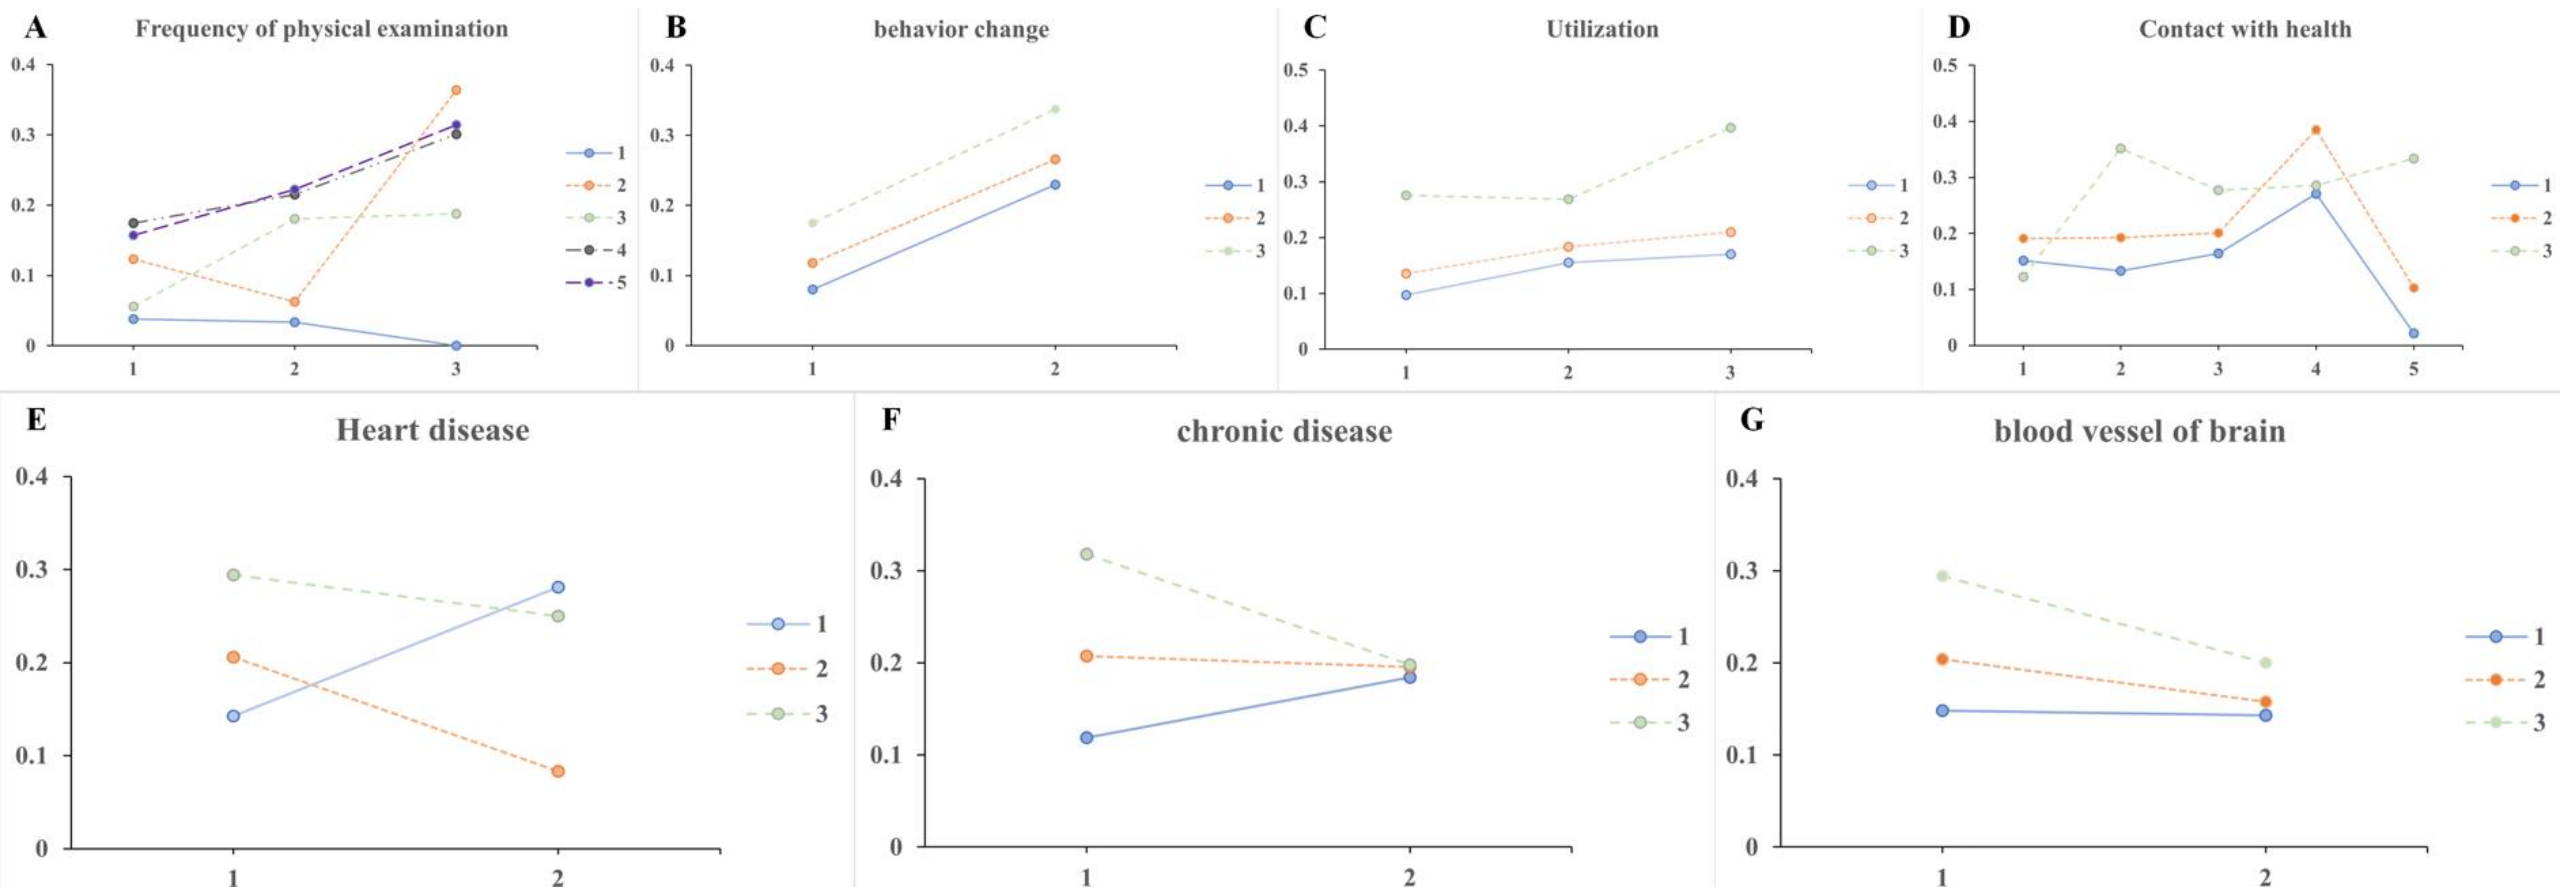

Figure S4: Line Charts of the Relationships between Different Health - related Variables
